# Supplementary material for: Micronutrient and Inflammation Status Following One Year of Complementary Food Supplementation in 18-Month-Old Rural Bangladeshi Children: A Randomized Controlled Trial
Source: MDPI journal article supplement (doi:10.3390/nu12051452), 2020-05-18
Supplement: s1 [file s1]

Supplementary Figure 1. Micronutrient status indicators by inflammation status in 18-mo-old children completing participation in a randomized-controlled complementary food supplementation trial in rural Bangladesh<sup>1,2,3</sup>

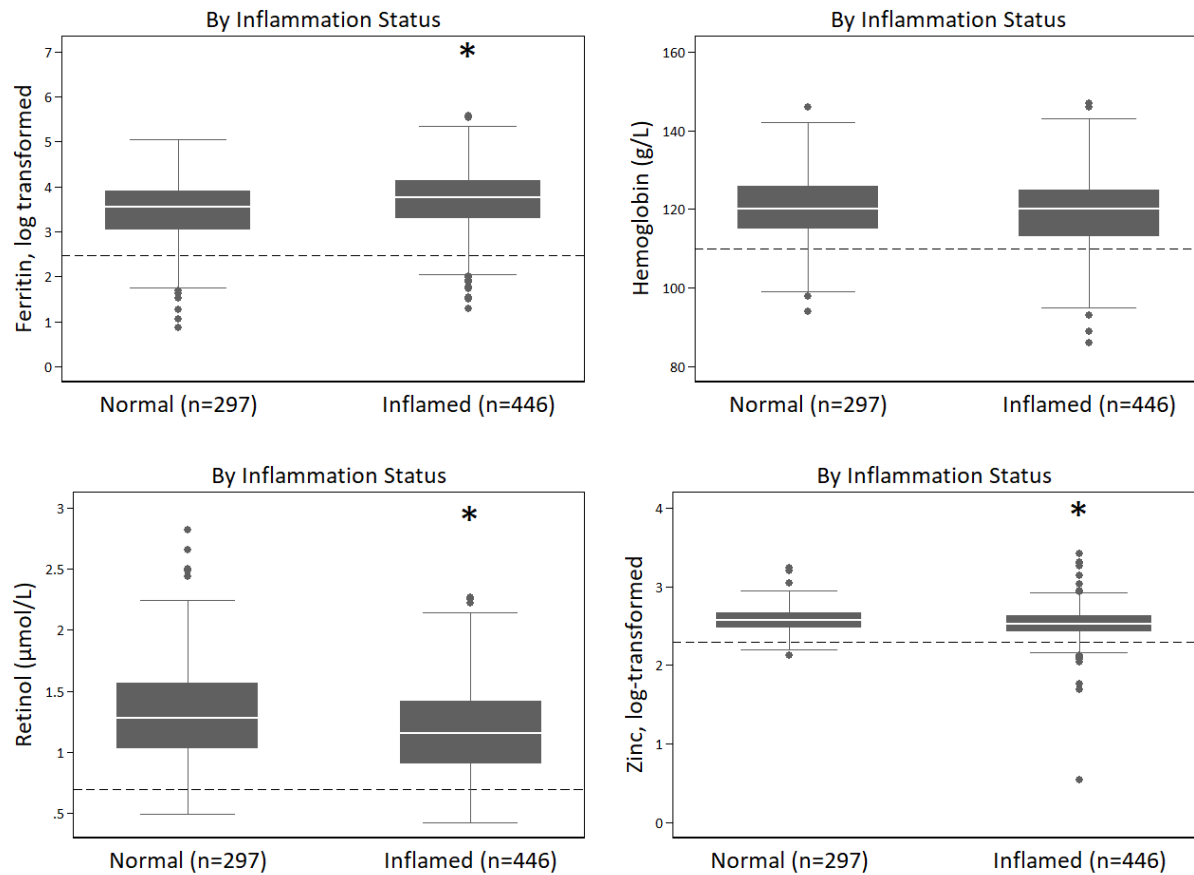

<sup>1</sup>Dashed lines indicate deficiency cutoffs for micronutrient markers

<sup>2</sup>Ferritin and zinc are displayed in log-transformed values and were log-transformed prior to GEE modeling

<sup>3</sup>Stars indicate a statistically significant difference ( $p \leq 0.05$ ) in micronutrient marker between the inflamed and uninflamed groups based on GEE linear regression models adjusted for child sex and baseline stunting status and for clustering by sector.
