# Supplementary material for: Micronutrient and Inflammation Status Following One Year of Complementary Food Supplementation in 18-Month-Old Rural Bangladeshi Children: A Randomized Controlled Trial
Source: MDPI journal article supplement (doi:10.3390/nu12051452), 2020-05-18
Supplement: s1 [file s1]

Supplementary Figure 2. Ferritin and hemoglobin values in 18-mo-old children completing participation in a one-year complementary food supplementation trial in Bangladesh by level of maternal-reported household drinking water iron content<sup>1,2,3</sup>

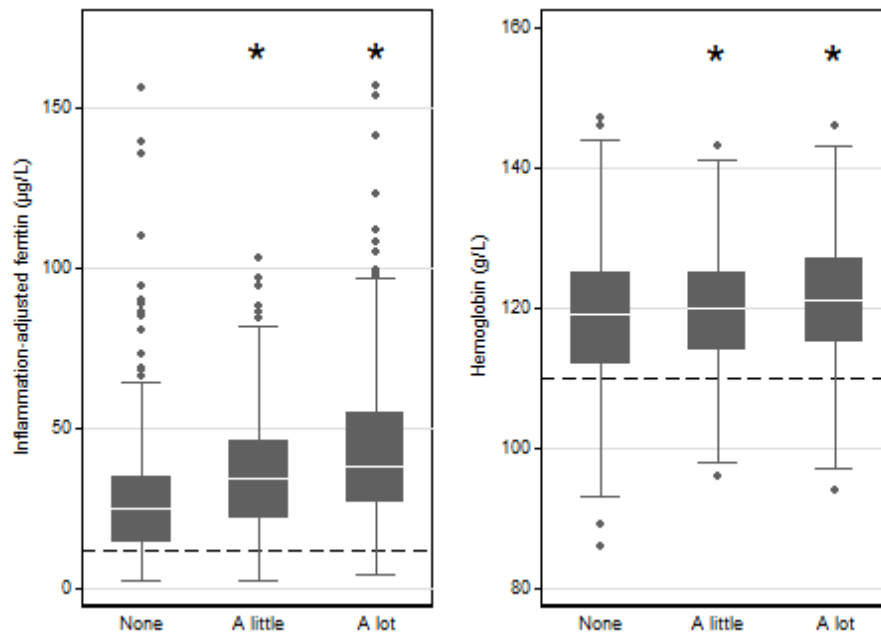

<sup>1</sup>Dashed lines indicate cutoffs for deficiency.

<sup>2</sup>Ferritin and retinol values adjusted for inflammation status according to BRINDA methods.<sup>28,29</sup> Ferritin was log-transformed prior to GEE modeling but is shown in the figure on the algorithmic scale.

<sup>3</sup>Stars indicate statistically significant difference ( $p \leq 0.05$ ) relative to the “none” group (no iron reported in drinking water) based on GEE linear regression models adjusted for child sex and baseline stunting status and for clustering by sector.
