# Supplementary material for: Micronutrient and Inflammation Status Following One Year of Complementary Food Supplementation in 18-Month-Old Rural Bangladeshi Children: A Randomized Controlled Trial
Source: Nutrients. 2020 May 18;12(5):1452. doi: 10.3390/nu12051452 (PMC7284655; doi:10.3390/nu12051452)
Supplement: Supplementary file 1 [file nutrients-12-01452-s001.zip]

Archive with 6 entries (6 files):
- Supplementary figure 1.pdf
- Supplementary figure 2.pdf
- Supplementary Table 1.docx
- Supplementary Table 2.docx
- Supplementary table 3.docx
- Supplementary table 4.docx
